# Supplementary material for: Analysis of local molecular motions of aromatic sidechains in proteins by 2D and 3D fast MAS NMR spectroscopy and quantum mechanical calculations
Source: Royal Society of Chemistry journal article supplement (doi:10.1039/c5cp04475h), 2015-01-01
Supplement: c5cp04475h1.pdf [file c5cp04475h1.pdf]

**Supporting Information**

**Analysis of Local Molecular Motions of Aromatic Sidechains in Proteins by  
2D and 3D Fast MAS NMR Spectroscopy and Quantum Mechanical  
Calculations**

Piotr Paluch, Tomasz Pawlak, Agata Jeziorna, Julien Trébosc, Guangjin Hou, Alexander J. Vega, Jean-Paul Amoureux, Martin Dracinsky, Tatyana Polenova and Marek J. Potrzebowski.

P. Paluch, T. Pawlak, Dr. Agata Jeziorna, Prof. M. J. Potrzebowski  
Polish Academy of Sciences, Centre of Molecular and Macromolecular Studies, Sienkiewicza 112, PL-90-363  
Lodz, Poland  
E-mail: [marekpot@cbmm.lodz.pl](mailto:marekpot@cbmm.lodz.pl)

Dr. J. Trébosc, Prof. J.-P. Amoureux Unit of Catalysis and Chemistry of Solids (UCCS), CNRS-8181,  
University Lille North of France, 59652 Villeneuve d'Ascq, France  
E-mail: [jean-paul.amoureux@univ-lille1.fr](mailto:jean-paul.amoureux@univ-lille1.fr)  
J.-P. Amoureux Physics Department & Shanghai Key Laboratory of Magnetic Resonance, East China Normal  
University, Shanghai 200062, China

Dr. Guangjin Hou, Dr. Alexander J. Vega, Prof. T. Polenova Department of Chemistry and Biochemistry,  
University of Delaware, Newark, Delaware, USA  
E-mail: [tpolenov@udel.edu](mailto:tpolenov@udel.edu)

Dr. Martin Dracinsky, Institute of Organic Chemistry and Biochemistry, AS CR, Flemingovo nam. 2, Prague,  
Czech Republic  
E-mail: [dracinsky@uochb.cas.cz](mailto:dracinsky@uochb.cas.cz)

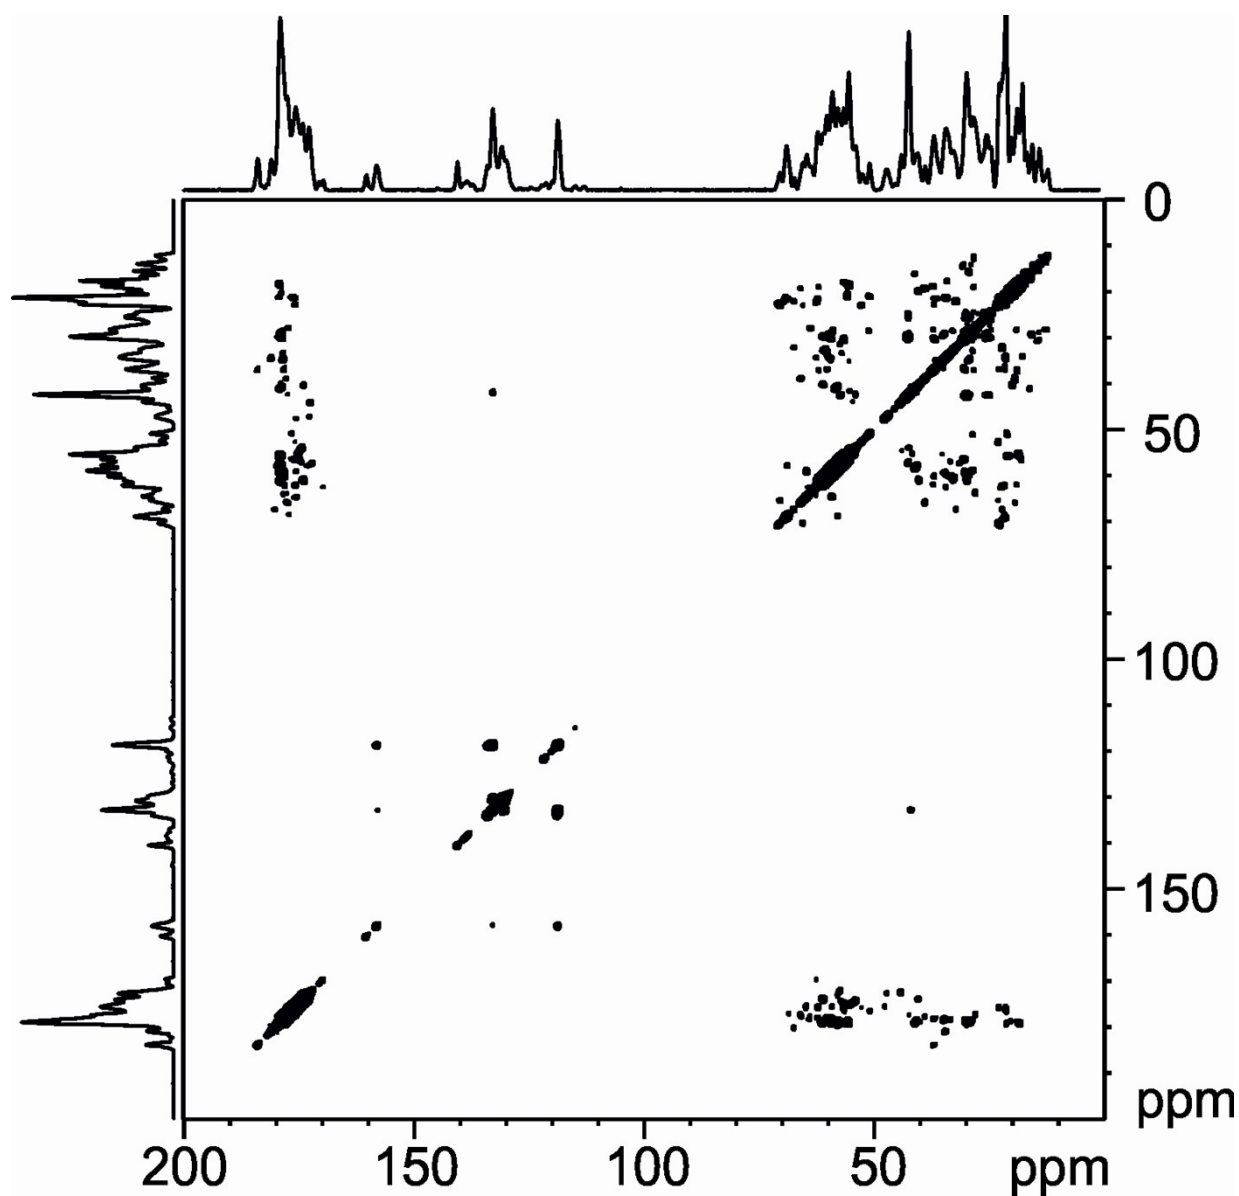

**Figure S1.** 2D  $^{13}\text{C}$ - $^{13}\text{C}$  RFDR spectrum of LC8 acquired with the mixing time of 16 ms.

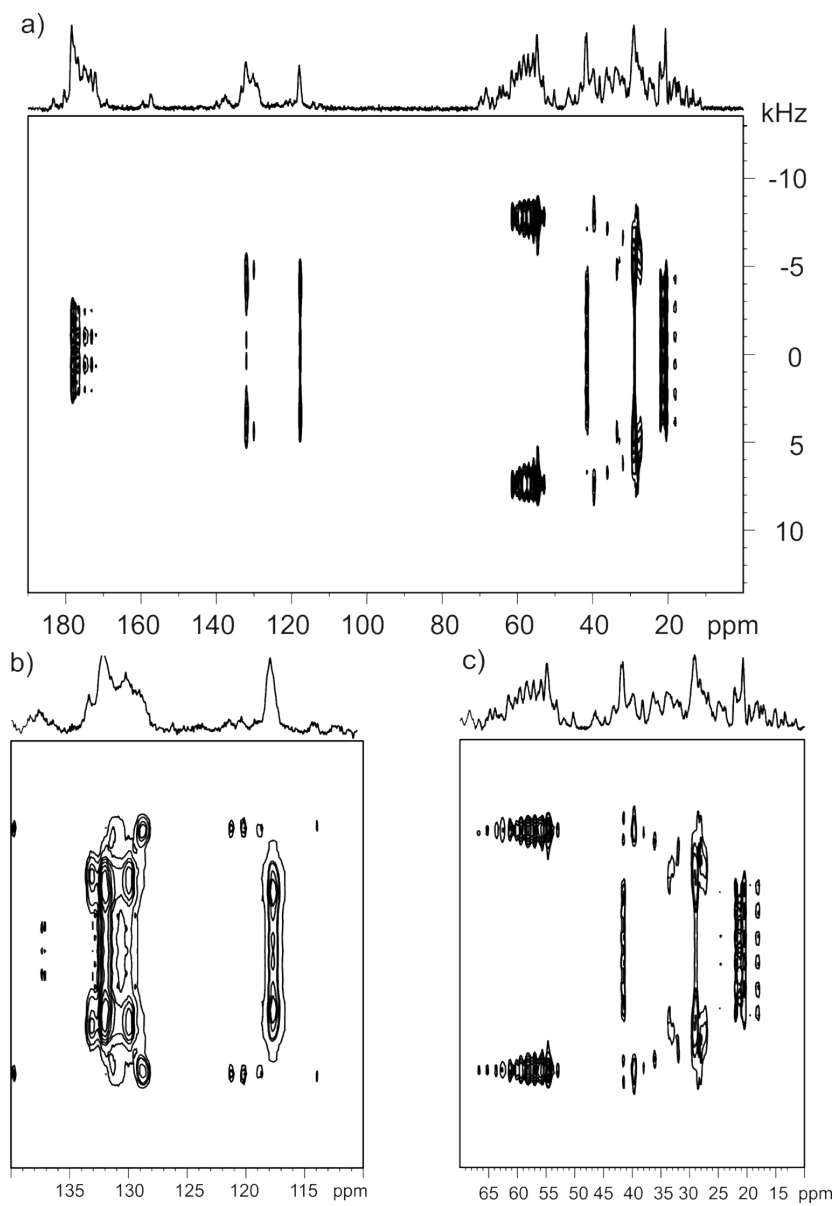

**Figure S2.** The 2D CPVC spectra of LC8 (a) and expansion around aromatic (b) and aliphatic (c) regions. The acquisition time was of 38.4 ms, the recycle delay of 2 s, the number of transients per  $t1$  step of 40, the number of  $t1$  steps of 128, thus giving a total experiment time of 3h. We used Swept-Frequency TPPM decoupling with RF = 10 kHz.

**Table S1.** <sup>13</sup>C Chemical Shifts of Aromatic Residues in LC8.

| Residue | C $\alpha$ | C $\beta$ | C'    | C $\gamma$ | C $\delta$ 1 | C $\delta$ 2 | C $\epsilon$ 1          | C $\epsilon$ 2          | C $\epsilon$ 3 | C $\zeta$               | C $\zeta$ 2 | C $\zeta$ 3 | C $\eta$ 2 | C $\eta$ 2'<br>(second conformer) |
|---------|------------|-----------|-------|------------|--------------|--------------|-------------------------|-------------------------|----------------|-------------------------|-------------|-------------|------------|-----------------------------------|
| Y32     | -          | -         | -     | -          | -            | -            | -                       | -                       | N/A            | -                       | N/A         | N/A         | N/A        | N/A                               |
| Y41     | 61.6       | 38.3      | 177.2 | 128.3      | 133.2        | 133          | 117.7                   | 117.7                   | N/A            | 157.2                   | N/A         | N/A         | N/A        | N/A                               |
| Y50     | 58.3       | 40.2      | 176.7 | -          | -            | -            | -                       | -                       | N/A            | -                       | N/A         | N/A         | N/A        | N/A                               |
| Y65     | 61         | 39.7      | 173   | 131.2      | 132.2        | 132.2        | 117.7                   | 117.7                   | N/A            | 157.2                   | N/A         | N/A         | N/A        | N/A                               |
| Y75     | 54.6       | 40.4      | 174.2 | 129.3      | 131.8        | 131.8        | 117.4                   | 117.4                   | N/A            | 157                     | N/A         | N/A         | N/A        | N/A                               |
| Y77     | 55.9       | 41.7      | 176.3 | -          | 131.5        | 131.5        | 117.8                   | 117.8                   | N/A            | 156.6                   | N/A         | N/A         | N/A        | N/A                               |
| H55     | 55         | 33.9      | 174.4 | 136.2      | N/A          | 119.4        | 138.9                   | N/A                     | N/A            | N/A                     | N/A         | N/A         | N/A        | N/A                               |
| H68     | 55.0       | 38.3      | 172.3 | -          | N/A          | -            | -                       | N/A                     | N/A            | N/A                     | N/A         | N/A         | N/A        | N/A                               |
| H72     | 53.9       | 40.2      | 174.0 | -          | N/A          | -            | -                       | N/A                     | N/A            | N/A                     | N/A         | N/A         | N/A        | N/A                               |
| F46     | 64         | 34.52     | 178.3 | 144        | 130.1        | 130.1        | overlap with C $\delta$ | overlap with C $\delta$ | N/A            | overlap with C $\delta$ | N/A         | N/A         | N/A        | N/A                               |
| F62     | 57.4       | 39.9      | 173.5 | 137.2      | 132.1        | 132.1        | 129.6                   | 129.6                   | N/A            | -                       | N/A         | N/A         | N/A        | N/A                               |
| F73     | 57.92      | 42.3      | 172.5 | 137.5      | 131.2        | 131.2        | 129.9                   | 129.9                   | N/A            | -                       | N/A         | N/A         | N/A        | N/A                               |
| F76     | 54.9       | 43.1      | 169.6 | 136.9      | 131.8        | 131.8        | 129.7                   | 129.9                   | N/A            | 128.8                   | N/A         | N/A         | N/A        | N/A                               |
| F86     | 56.4       | 42.3      | 172.3 | 138.4      | 131.7        | 131.7        | 130.8                   | 130.8                   | N/A            | 129.1                   | N/A         | N/A         | N/A        | N/A                               |
| W54     | 56         | 30        | 173.9 | 112.1      | 129.5        | 131          |                         | 137.6                   | 120.3          | N/A                     | 114.1       | 121.1       | 123.5      | 124.8                             |

**Table S2.** Dipolar Interaction Parameters for the Aromatic Residues in YAF, GB1, and LC8  
Obtained by 3D CPVC-RFDR NMR Spectroscopy.

| Residue (Cross peak)                                       | $\bar{\delta}_{iso}$ (ppm) | $\omega_D$ (kHz) | $\eta_D$ |
|------------------------------------------------------------|----------------------------|------------------|----------|
| <b>YAF</b>                                                 |                            |                  |          |
| Y2 (C $\delta$ 1,C $\delta$ 2)                             | 132.6                      | 23.2             | 0.20     |
| Y2 (C $\epsilon$ 1,C $\epsilon$ 2)                         | 115.8                      | 22.8             | 0.16     |
| F3 (C $\delta$ 1,C $\delta$ 2)                             | 129.4                      | 12.3             | 0.42     |
| F3 (C $\epsilon$ 1,C $\epsilon$ 2)                         | 127.0                      | 12.2             | 0.45     |
| F3 (C $\zeta$ )                                            | 125.8                      | 22.9             | 0.00     |
| <b>GB1</b>                                                 |                            |                  |          |
| Carbons on mobile residues                                 |                            |                  |          |
| Y3 (C $\delta$ 1,C $\delta$ 2)                             | 133.3                      | 14.5             | 0.46     |
| Y33 (C $\delta$ 1,C $\delta$ 2)                            | 132.1                      | 14.3             | 0.04     |
| Y33 (C $\delta$ 1,C $\delta$ 2-C $\zeta$ )                 | 132.1                      | 14.1             | 0.01     |
| Y33 (C $\epsilon$ 1,C $\epsilon$ 2)                        | 132.4                      | 14.1             | 0.04     |
| Y33 (C $\epsilon$ 1,C $\epsilon$ 2-C $\gamma$ )            | 132.4                      | 13.9             | 0.05     |
| Y33 (C $\epsilon$ 1,C $\epsilon$ 2-C $\zeta$ )             | 132.4                      | 14.3             | 0.03     |
| Y45 (C $\epsilon$ 1,C $\epsilon$ 2)                        | 117.5                      | 14.2             | 0.12     |
| Carbons on rigid residues                                  |                            |                  |          |
| W43 (C $\delta$ 1)                                         | 127.0                      | 22.2             | 0.10     |
| W43 (C $\delta$ 1-C $\gamma$ )                             | 127.0                      | 22.7             | 0.03     |
| W43 (C $\epsilon$ 3)                                       | 120.1                      | 22.6             | 0.10     |
| W43 (C $\epsilon$ 3-C $\delta$ 2)                          | 120.1                      | 22.4             | 0.08     |
| W43 (C $\epsilon$ 3-C $\epsilon$ 2)                        | 120.1                      | 22.6             | 0.13     |
| W43 (C $\epsilon$ 3-C $\gamma$ )                           | 120.1                      | 22.6             | 0.07     |
| W43 (C $\epsilon$ -C $\eta$ )                              | 117.9                      | 22.6             | 0.00     |
| W43 (C $\eta$ 2)                                           | 122.7                      | 22.9             | 0.23     |
| W43 (C $\eta$ 2-C $\epsilon$ 3)                            | 122.7                      | 22.8             | 0.01     |
| W43 (C $\eta$ 2-C $\zeta$ )                                | 122.7                      | 22.8             | 0.01     |
| W43 (C $\zeta$ )                                           | 114.1                      | 22.4             | 0.03     |
| W43 (C $\zeta$ -C $\delta$ )                               | 114.1                      | 23.3             | 0.19     |
| W43 (C $\zeta$ -C $\epsilon$ )                             | 114.1                      | 22.9             | 0.01     |
| W43 (C $\zeta$ -C $\eta$ )                                 | 114.1                      | 23.3             | 0.19     |
| F52 (C $\epsilon$ 1,C $\epsilon$ 2,C $\zeta$ )             | 131.0                      | 21.8             | 0.00     |
| F52 (C $\epsilon$ 1,C $\epsilon$ 2,C $\zeta$ -C $\gamma$ ) | 131.0                      | 22.0             | 0.06     |
| Carbons that do not carry a hydrogen                       |                            |                  |          |
| W43 (C $\epsilon$ 2)                                       | 138.2                      | 2.7              | 0.42     |

|                  |       |     |      |
|------------------|-------|-----|------|
| W43 (Cε2-Cζ)     | 138.2 | 1.5 | 0.22 |
| Y3 (Cζ)          | 158.4 | 3.6 | 0.49 |
| Y3 (Cζ-Cε1,Cε2)  | 158.4 | 5.5 | 0.16 |
| Y33 (Cζ)         | 158.4 | 5.0 | 0.80 |
| Y33 (Cζ-Cε1,Cε2) | 158.4 | 5.2 | 0.07 |
| Y45 (Cζ)         | 157.3 | 5.6 | 0.11 |

### LC8

#### Carbons on mobile residues

|                       |       |      |      |
|-----------------------|-------|------|------|
| Y41 (Cε1,Cε2)         | 117.3 | 11.6 | 0.49 |
| Y41 (Cε1,Cε2-Cζ)      | 117.3 | 12.4 | 0.69 |
| Y41 (Cδ1,Cδ2)         | 132.8 | 14.0 | 0.32 |
| Y41 (Cδ1,Cδ2-Cε1,Cε2) | 132.8 | 14.2 | 0.27 |
| Y41 (Cδ1,Cδ2-Cγ)      | 132.8 | 14.4 | 0.30 |
| Y65 (Cδ1,Cδ2)         | 131.4 | 12.0 | 0.75 |
| Y65 (Cδ1,Cδ2-Cε1,Cε2) | 131.4 | 10.9 | 0.67 |
| Y65 (Cδ1,Cδ2-Cζ)      | 131.4 | 13.1 | 0.46 |
| Y65 (Cδ1,Cδ2)         | 131.4 | 12.0 | 0.75 |
| Y75 (Cε1,Cε2)         | 117.0 | 11.9 | 0.76 |
| Y75 (Cε1,Cε2-Cδ1,Cδ2) | 117.0 | 10.4 | 0.59 |
| Y75 (Cδ1,Cδ2)         | 131.5 | 12.2 | 0.70 |
| Y75 (Cδ1,Cδ2-Cε1,Cε2) | 131.5 | 11.2 | 0.66 |
| Y75 (Cδ1,Cδ2-Cε1,Cε2) | 131.5 | 12.3 | 0.60 |
| Y77 (Cδ1,Cδ2-Cζ)      | 131.5 | 10.8 | 0.48 |
| Y77 (Cε1,Cε2-Cζ)      | 131.3 | 11.6 | 0.66 |
| F76 (Cδ1,Cδ2-Cε1,Cε2) | 131.4 | 14.6 | 0.05 |
| F76 (Cζ-Cγ)           | 128.8 | 21.9 | 0.26 |

#### Carbons on rigid residues

|              |       |      |      |
|--------------|-------|------|------|
| W54 (Cζ2)    | 113.6 | 21.8 | 0.20 |
| W54 (Cε3)    | 120.4 | 22.0 | 0.06 |
| H55 (Cδ2)    | 118.4 | 21.7 | 0.17 |
| H55 (Cδ2-Cγ) | 118.4 | 21.9 | 0.14 |
| H55 (Cε1)    | 139.2 | 22.0 | 0.06 |
| H55 (Cε1)    | 139.3 | 22.1 | 0.14 |

\*The carbon atom whose dipolar lineshape is recorded is listed first; diagonal peaks are labeled with a single frequency.
